1 **A *Rhizobiales*-specific unipolar polysaccharide adhesin contributes to *Rhodopseudomonas***  
2 ***palustris* biofilm formation across diverse photoheterotrophic conditions**

3

4 Ryan K. Fritts, Breah LaSarre, Ari M. Stoner<sup>\*</sup>, Amanda L. Posto, and James B. McKinlay<sup>#</sup>

5 Department of Biology, Indiana University, Bloomington, Indiana, USA

6 Running title: *R. palustris* UPP is used during photoheterotrophy

7 <sup>#</sup>Address correspondence to James B. McKinlay, [jmckinla@indiana.edu](mailto:jmckinla@indiana.edu).

8 <sup>\*</sup>Present address: Center for Genes, Environment & Health, National Jewish Health, Denver,

9 Colorado, USA

## 10 **ABSTRACT**

11 Bacteria predominantly exist as members of surfaced-attached communities known as biofilms.  
12 Many bacterial species initiate biofilms and adhere to each other using cell surface adhesins.  
13 This is the case for numerous ecologically diverse *α-proteobacteria*, which use polar  
14 exopolysaccharide adhesins for cell-cell adhesion and surface attachment. Here, we show that  
15 *Rhodopseudomonas palustris*, a metabolically versatile member of the *α-proteobacterial* order  
16 *Rhizobiales*, encodes a functional unipolar polysaccharide (UPP) biosynthesis gene cluster.  
17 Deletion of genes predicted to be critical for UPP biosynthesis and export abolished UPP  
18 production. We also found that *R. palustris* uses UPP to mediate biofilm formation across  
19 diverse photoheterotrophic growth conditions, wherein light and organic substrates are used to  
20 support growth. However, UPP was less important for biofilm formation during  
21 photoautotrophy, where light and CO<sub>2</sub> support growth, and during aerobic respiration with  
22 organic compounds. Expanding our analysis beyond *R. palustris*, we examined the phylogenetic  
23 distribution and genomic organization of UPP gene clusters among *Rhizobiales* species that  
24 inhabit diverse niches. Our analysis suggests that UPP is a conserved ancestral trait of the  
25 *Rhizobiales* but that it has been independently lost multiple times during the evolution of this  
26 clade, twice coinciding with adaptation to intracellular lifestyles within animal hosts.

## 27 **IMPORTANCE**

28 Bacteria are ubiquitously found as surface-attached communities and cellular aggregates in  
29 nature. Here, we address how bacterial adhesion is coordinated in response to diverse  
30 environments using two complementary approaches. First, we examined how  
31 *Rhodopseudomonas palustris*, one of the most metabolically versatile organisms ever described,  
32 varies its adhesion to surfaces in response to different environmental conditions. We identified

33 critical genes for the production of a unipolar polysaccharide (UPP) and showed that UPP is  
34 important for adhesion when light and organic substrates are used for growth. Looking beyond *R.*  
35 *palustris*, we performed the most comprehensive survey to date on the conservation of UPP  
36 biosynthesis genes among a group of closely related bacteria that occupy diverse niches. Our  
37 findings suggest that UPP is important for free-living and plant-associated lifestyles but  
38 dispensable for animal pathogens. Additionally, we propose guidelines for classifying the  
39 adhesins produced by various *α-proteobacteria*, facilitating future functional and comparative  
40 studies.

41

## 42 INTRODUCTION

43 Diverse bacteria produce cell surface adhesins that facilitate attachment to biotic and abiotic  
44 surfaces (1, 2). Some of the earliest observations of bacterial adhesion reported bacterial ‘stars’,  
45 later termed rosettes, in which cells aggregate by attaching to each other at a single pole (3).  
46 Similarly, initial observations of bacterial adhesion to abiotic surfaces also noted polar  
47 attachment (4). It has since been recognized that the same polar adhesins responsible for rosette  
48 formation in many *α-proteobacterial* species also mediate irreversible attachment to surfaces and  
49 thereby act to initiate formation of surface-associated communities known as biofilms (1, 5, 6).

50 Polar surface attachment in *α-proteobacteria* has been most well studied in the freshwater  
51 bacterium, *Caulobacter crescentus* (5, 7–10), and more recently in the plant pathogen,  
52 *Agrobacterium tumefaciens* (11–13). The polar adhesin of *C. crescentus* and other members of  
53 the order *Caulobacterales* is called holdfast (1, 14). The polar adhesin of *A. tumefaciens* has been  
54 termed unipolar polysaccharide (UPP) (11). These two unipolar adhesins are distinct but share

55 certain genetic, biochemical, and functional characteristics (1, 11). Synthesis of both adhesins  
56 involves a Wzy-dependent polysaccharide synthesis and export pathway. For holdfast, this  
57 pathway is encoded by the holdfast synthesis (*hfs*) gene cluster (8, 15). For UPP, the pathway is  
58 partially encoded by the core *upp* biosynthesis gene cluster, with other components encoded  
59 separately in the genome (11). The *hsfEFGHCBAD* and *uppABCDEFGF* gene clusters each have  
60 distinct organization and content (i.e., synteny) (Fig. S1). Only *hfsD* and *hfsE* have close  
61 sequence similarity to *uppC* and *uppE*, respectively (Table S1), although other genes likely  
62 encode functionally analogous proteins between these two gene clusters. A contrasting feature of  
63 these two adhesins is that holdfast-mediated adhesion requires proteins encoded by the holdfast  
64 anchor (*hfa*) operon, which keeps holdfast attached to the cell (16). No apparent homologs of *hfa*  
65 genes are encoded by *A. tumefaciens* (11) or most other *Rhizobiales* species (Dataset S1).  
66 Holdfast and UPP also exhibit some biochemical similarity, as both contain *N*-acetylglucosamine  
67 (7, 11), allowing the adhesins to be visualized by fluorescence microscopy after staining with the  
68 fluorophore-conjugated wheat germ agglutinin (5, 17).

69 Beyond *C. crescentus* and *A. tumefaciens*, polar polysaccharide adhesins are also a common  
70 morphological trait across ecologically diverse  *$\alpha$ -proteobacteria* (1, 14, 18), especially among  
71 *Rhizobiales* species (19–25). However, the genetic and biochemical diversity of the adhesins  
72 across this clade is unclear. Furthermore, the potential environment-specific production and/or  
73 function of these adhesins remain largely unexplored. Here we examine polar adhesin production  
74 by the *Rhizobiales* member, *Rhodopseudomonas palustris*. This purple non-sulfur bacterium was  
75 first reported to produce a polar adhesin almost 50 years ago (26), but the genes involved in its  
76 biosynthesis were never characterized. Additionally, *R. palustris* is renowned for its metabolic  
77 versatility (27), a feature that allowed us to investigate if adhesin production is coordinated with

78 different metabolic modules. We show that the putative *R. palustris* *uppE* (RPA2750) and *uppC*  
79 (RPA4833) orthologs are required for synthesis of a UPP adhesin. UPP is differentially required  
80 for *R. palustris* biofilm formation under various conditions, but is particularly influential under  
81 photoheterotrophic conditions, in which light energy and organic substrates are used to support  
82 growth. Moving beyond *R. palustris*, we also explored whether UPP is associated with different  
83 bacterial lifestyles by performing a comparative genomic analysis across diverse *Rhizobiales*  
84 species. Our results indicate that UPP is a conserved ancestral trait of the *Rhizobiales*, and that  
85 *upp* genes have been independently lost multiple times during the evolution of the *Rhizobiales*  
86 clade. Based on our analysis, we propose that genetic synteny of adhesion biosynthesis genes is a  
87 valid criterion on which to designate the polar adhesins of various *Rhizobiales* members as  
88 ‘UPP’.

## 89 MATERIALS AND METHODS

90 **Bacterial strains and growth conditions.** All *R. palustris* strains were derived from CGA009  
91 (27) and are listed in Table 1. Unless otherwise indicated, *R. palustris* was grown statically in 10  
92 ml of defined photosynthetic medium (PM) (28) in sealed 27-ml anaerobic tubes with argon gas  
93 in the headspace. All *R. palustris* cultures were incubated at 30 °C. All phototrophic cultures  
94 were illuminated with a 60-W light bulb. For all heterotrophic conditions, PM was supplemented  
95 with succinate as the sole carbon source (15 mM in liquid cultures or 10 mM in agar). Incubation  
96 in PM with 15 mM succinate and light are henceforth referred to as standard photoheterotrophic  
97 conditions. For low phosphate ( $P_i$ ) conditions, PM was modified by replacing  $Na_2HPO_4$  and  
98  $KH_2PO_4$  (12.5 mM each) with equimolar concentrations of  $Na_2SO_4$  and  $K_2SO_4$ . A 1:1 molar  
99 mixture of  $Na_2HPO_4$  and  $KH_2PO_4$  was added for a final  $P_i$  concentration of 30  $\mu$ M. For  $N_2$ -fixing  
100 conditions,  $(NH_4)_2SO_4$  was omitted from PM and argon was replaced with  $N_2$ . For high salinity

101 conditions, PM was supplemented with 1.5% (w/v) sea salts (Sigma) or NaCl. For  
102 chemoheterotrophic conditions, cultures were grown in 10 ml of aerobic PM supplemented with  
103 0.05% yeast extract in addition to 15 mM succinate in 50-ml Erlenmeyer flasks shaken at 225  
104 rpm in darkness. For photoautotrophic conditions, anaerobic PM was supplemented with 60 mM  
105 NaHCO<sub>3</sub> as the inorganic carbon source and 30 mM Na<sub>2</sub>S<sub>2</sub>O<sub>3</sub> as an inorganic electron donor.  
106 Plasmid-harboring *R. palustris* strains were grown with 50 µg/ml gentamicin in liquid culture  
107 and 100 µg/ml gentamicin on agar plates. *Escherichia coli* strains used for cloning (DH5-α, S17-  
108 1) were grown aerobically in Luria-Bertani medium supplemented with 15 µg/ml gentamycin  
109 when necessary.

110 ***R. palustris* strain construction.** All plasmids and primers are listed in Tables 1 and 2,  
111 respectively. Deletion vectors for *uppC* (RPA4833) and *uppE* (RPA2750) were generated by  
112 PCR-amplification of the genomic regions flanking the gene to be deleted as described (29).  
113 PCR product pairs were fused by overlap extension PCR and cloned into pJQ200SK (30).  
114 Vectors were introduced into *R. palustris* by conjugation with *E. coli* S17-1 (31) or by  
115 electroporation (32). Complementation vectors for *uppC* and *uppE* were generated by PCR-  
116 amplification of each gene along with the putative ribosomal binding site. PCR products were  
117 cloned into pBBPgdh (33), and complementation and empty pBBPgdh vectors were introduced  
118 into *R. palustris* by conjugation with *E. coli* S17-1.

119 **Epifluorescence microscopy and image analysis.** Unless stated otherwise, *R. palustris* cultures  
120 used for microscopy were grown in liquid without agitation for 2-3 days (d), except for  
121 photoautotrophic cultures, which were grown for 8 d. Culture samples were centrifuged and the  
122 cell pellet was resuspended in P<sub>i</sub>-buffered saline (PBS) to an optical density between 0.6-0.9  
123 (OD<sub>660</sub>). Wheat germ agglutinin Alexa Fluor® 488 conjugate (WGA-488) (Molecular Probes)

124 was added to cells suspended in PBS at a final concentration of 2  $\mu\text{g}/\text{ml}$  and incubated in  
125 darkness at room temperature for 15 min. Cells were washed with PBS three times to remove  
126 unbound dye and then resuspended in PBS. Cells were imaged on agarose pads using a Nikon  
127 Eclipse 90i light microscope equipped with a 100X oil immersion objective and a Photometrics  
128 Cascade 1K EMCCD camera, and processed using the Nikon NIS-Elements software. Images  
129 were subsequently analyzed using the ImageJ distribution Fiji (34).

130 **Batch UPP quantification via total WGA-fluorescence.** *R. palustris* cultures were grown  
131 under standard photoheterotrophic conditions for 3 d to early stationary phase. 400  $\mu\text{l}$  culture  
132 samples were centrifuged and the cell pellet was resuspended in 400  $\mu\text{l}$  of PBS. 100  $\mu\text{l}$  of each  
133 cell suspension was set aside for use as the unstained control. WGA-488 was added to the  
134 remaining 300  $\mu\text{l}$  of resuspended cells to a final concentration of 1.5  $\mu\text{g}/\text{ml}$  and incubated in  
135 darkness at room temperature for 15 min. WGA488-stained cells were washed three times with  
136 PBS and then resuspended in 120  $\mu\text{l}$  PBS to account for cells lost during washes. 100  $\mu\text{l}$  of the  
137 stained cells and the reserved unstained samples were each transferred to empty wells of a black  
138 polystyrene 96-well  $\mu\text{Clear}^{\circledR}$  flat bottom microtiter plate (Greiner Bio-One). Fluorescence (top-  
139 120: excitation 485/20; emission 528/20) and  $\text{OD}_{660}$  were measured using a Synergy H1  
140 microplate reader (BioTek). Fluorescence readings were normalized to cell densities  
141 ( $\text{RFU}/\text{OD}_{660}$ ) and background fluorescence was removed by subtracting  $\text{RFU}/\text{OD}_{660}$  values of  
142 unstained samples from the WGA-488 stained samples.

143 **Crystal violet microtiter plate biofilm assay.** Biofilm formation was quantified using a  
144 modified version a crystal violet microtiter plate assay (35). Briefly, starter cultures were grown  
145 under standard photoheterotrophic conditions supplemented with 0.1% yeast extract. 1.5  $\mu\text{l}$  of  
146 stationary phase culture was used to inoculate the wells of a lidded, untreated polystyrene 24-

147 well plate (Corning) containing 1.5 ml of the specified sterile medium. All plates were incubated  
148 statically at 30 °C. For anaerobic phototrophic growth conditions, plates were incubated in a BD  
149 GasPak™ EZ container with two EZ Anaerobe Container System Sachets (BD) and illuminated  
150 by two 60-W light bulbs, one on either side of the container. For chemoheterotrophic growth,  
151 plates were in air in darkness. For all heterotrophic growth conditions, plates were incubated for  
152 4 d. For photoautotrophic growth conditions (and paired heterotrophic controls), plates were  
153 incubated for 10 d. After incubation, plates were shaken at 150 rpm for 3 min on a flat-bed rotary  
154 shaker to disrupt loosely attached cells. A 400 µl aliquot of culture was removed for quantifying  
155 cell density (OD<sub>660</sub>) for normalization. 400 µl of 0.1% (w/v) crystal violet (CV) was added to  
156 each well, and plates were incubated statically at room temperature for 15 min. Wells were then  
157 washed 3 times with 2 ml of deionized water to remove unbound CV. 750 µl of 10% (v/v) acetic  
158 acid was then added to each well, followed by shaking at 150 rpm for 3 minutes to solubilize  
159 bound CV. 150 µl of solubilized CV was transferred to a 96-well plate and absorbance was  
160 measured at 570 nm (A<sub>570</sub>). Uninoculated wells containing sterile medium were treated the same  
161 way as described above to determine background A<sub>570</sub>, which was subsequently subtracted from  
162 all A<sub>570</sub> measurements.

163 **Identification of orthologous core *upp* gene clusters and phylogenetic analysis.** The putative  
164 orthologs of the core UPP biosynthesis genes in *R. palustris* CGA009 (GenBank accession  
165 number: BX571963.1) were initially identified by reciprocal best hit analysis using the  
166 UppABCDEF proteins of *A. tumefaciens* C58 (GenBank accession number: AE007869.2) as the  
167 query sequences for a TBLASTN search against the translated nucleotide database of *R. palustris*  
168 CGA009. The best hits in *R. palustris* CGA009 were subsequently used as query sequences for a  
169 BLASTX search against the proteome of *A. tumefaciens* C58. All putative *R. palustris* orthologs



170 showed > 50% query cover and an E value <  $1 \times 10^{-20}$  (Table S2). Previous studies noted that the  
171 core *uppABCDEF* biosynthesis gene cluster is conserved among several *Rhizobiales* species (20,  
172 23), which was confirmed by using BLASTP with *A. tumefaciens* C58 UppABCDEF proteins as  
173 query sequences (Dataset S2). Several additional species that encode complete or near complete  
174 *upp* gene clusters were also identified using BLASTP (minimum threshold for homology of  
175 query cover > 50%, E value <  $1 \times 10^{-10}$ ; Dataset S2).

176 For phylogenetic analysis, amino acid sequences for 6 conserved housekeeping proteins,  
177 GyrA, GyrB, RpoA, RpoB, FusA, and RecA from 26  $\alpha$ -proteobacterial species were individually  
178 aligned using MUSCLE (36) with default settings in MEGA6 (37). Gaps and ambiguous sites  
179 were removed from alignments using Gblocks (38), with a minimum block length of 10 positions  
180 and gaps allowed at a position for no more than half of the sequences. The final concatenated  
181 alignment contained 4,379 amino acid positions (92% of the original positions). Phylogeny was  
182 inferred for the concatenated amino acid sequence using the maximum likelihood method based  
183 on the Le and Gascuel (LG) 2008 model (39) with 4 discrete gamma categories, which allowed  
184 for some sites to be evolutionarily invariable, implemented in MEGA6 (37). The LG+G+I model  
185 was selected because it was the best-fitting substitution model based on having the lowest  
186 Bayesian information criterion score. Node values indicate branch support from 100 bootstrap  
187 replicates. Initial tree(s) for the heuristic search were obtained by applying the Neighbor-Joining  
188 method to a matrix of pairwise distances estimated using a Jones-Taylor-Thornton model.

189 **Statistical Analysis.** All statistical analyses were performed using GraphPad Prism version 6.07.  
190 Additional information about statistical analyses are in the figure legends and for Fig. 3A, in  
191 Table S4.

192

## 193 RESULTS/DISCUSSION

### 194 Genomic organization of the putative *R. palustris* CGA009 core *upp* gene cluster. *R.*

195 *palustris* has long been known to form rosettes (26, 40), however the genetic loci responsible for  
196 polar adhesin biosynthesis remained uncharacterized. Recently, bioinformatic analysis revealed  
197 that *R. palustris* encodes a putative *upp* gene cluster (23). We confirmed that *R. palustris*  
198 CGA009 encodes a putative *upp* gene cluster using a TBLASTN reciprocal best hits approach  
199 with the *A. tumefaciens* C58 UppABCDEF proteins as query sequences. We identified four  
200 adjacent genes in *R. palustris* with close identity to *A. tumefaciens uppABDE* (Fig. 1A, Table  
201 S2). Candidate orthologs for both *uppC* (RPA4833) and *uppF* (RPA4581) were outside the  
202 putative *R. palustris uppABDE* cluster (RPA2753-2750) (Fig. 1A). As expected based on species  
203 relatedness, the synteny of the putative *R. palustris upp* gene cluster is more similar to that of *A.*  
204 *tumefaciens* than to the *C. crescentus hfs* gene cluster (Fig. S1). Also similar to *A. tumefaciens*  
205 (11), we did not identify any candidate *hfa* homologs in *R. palustris* (Dataset S1).

206 The putative *R. palustris uppABDE*, *C*, and *F* genes are predicted to encode a partial  
207 Wzy-dependent polysaccharide export pathway (Fig. 1B). Wzy-dependent pathways are broadly  
208 distributed across Gram-negative bacteria (41) and have been most well characterized in  
209 lipopolysaccharide and capsular polysaccharide biosynthesis and export in *E. coli* (42). We  
210 propose a Wzy-dependent model for UPP synthesis and export based on the current  
211 understanding of Wzy-dependent pathways (Fig. 1B), similar to what has been proposed for  
212 holdfast production (15). Briefly, an iterative, multi-enzyme process assembles repeat saccharide  
213 units (grey hexagons) on the inner membrane (IM)-associated lipid carrier, undecaprenyl  
214 phosphate (und-PP). The assembly is then translocated across the IM and into the periplasm  
215 where the repeat saccharide units are transferred from und-PP to add to the growing

216 polysaccharide chain on another und-PP carrier. Ultimately the polysaccharide chain is exported  
217 onto the cell surface (Fig. 1B). It should be noted that for UPP, certain enzymes thought to be  
218 required for synthesis are encoded outside the core *upp* cluster, such as a flippase (Fig. 1B,  
219 white) responsible for translocation across the IM. This genetic arrangement is distinct from *C.*  
220 *crescentus* and most other *Caulobacterales* species, which encode putative Wzx-like flippases  
221 (HfsF) in their *hfs* gene clusters (15, 17, 43).

222 **Visualization of *R. palustris* unipolar adhesin.** To facilitate genetic and phenotypic  
223 characterization of the *R. palustris* adhesin, we first tested if we could visualize adhesin on WT  
224 *R. palustris* cells using the fluorophore-conjugated lectin, WGA-488. Adhesins produced by  
225 diverse *α-proteobacteria* have been shown to bind WGA (5, 7, 44), which itself binds *N*-  
226 acetylglucosamine residues. When we stained *R. palustris* with WGA-488, we observed  
227 fluorescence at single poles of some individual cells and at the center of every rosette (Fig. 2A).  
228 From this, we conclude that the unipolar adhesin produced by *R. palustris* contains *N*-  
229 acetylglucosamine, similar to the UPP of other *Rhizobiales* species (11, 23, 24), as well as  
230 *Caulobacterales* holdfast (7, 17).

231 **UppE and UppC are required for *R. palustris* UPP biosynthesis, cell-cell adhesion,**  
232 **and biofilm formation.** We next addressed the genetic requirements underlying polar adhesin  
233 production in *R. palustris*. In *A. tumefaciens*, *uppE* (12, 13) and *uppC* (C. Fuqua; personal  
234 communication) are essential for UPP biosynthesis. Similarly, the *uppE* ortholog (*gmsA*) of the  
235 root-nodulating symbiont *Rhizobium leguminosarum* is necessary for root hair attachment (20).  
236 In *C. crescentus*, the putative *uppC* homolog, *hfsD*, is required for holdfast-mediated attachment  
237 (8). Thus, we chose the putative *uppE* and *uppC* orthologs of *R. palustris* as targets for in-frame  
238 deletions to determine whether they are required for adhesin synthesis.

239 Deletion of either the putative *uppE* or *uppC* ortholog eliminated both rosette formation  
240 and WGA-488 binding (Fig. 2A). Complementation of each mutant from a plasmid restored  
241 rosette formation as well as unipolar WGA-488 binding to single cells and at the center of  
242 rosettes (Fig. 2A). In addition to microscopic visualization of the adhesin on cells, we also  
243 developed an assay to quantify adhesin production at the population level by measuring total  
244 WGA-488 fluorescence in batch culture samples. Similar to trends observed by microscopy, total  
245 WGA-488 fluorescence was significantly lower in the putative  $\Delta uppE$  or  $\Delta uppC$  mutant cultures  
246 compared to WT and the complemented cultures (Fig. 2B). Overall these results demonstrate an  
247 essential role for both of these orthologs in adhesin production in *R. palustris*. Based on these  
248 results, we henceforth refer to these genes as *uppE* and *uppC*, and to the *R. palustris* unipolar  
249 adhesin as UPP.

250 Having established that *uppE* and *uppC* are critical for *R. palustris* UPP synthesis and  
251 rosette formation, we next assessed if *R. palustris* UPP contributes to biofilm formation. After 4  
252 days of standard photoheterotrophic growth, the  $\Delta uppE$  and  $\Delta uppC$  mutants showed significantly  
253 less biofilm formation compared to the WT and complemented strains (Fig. 2C). Thus, we  
254 conclude that UPP is the primary adhesin facilitating biofilm formation under standard  
255 photoheterotrophic conditions.

256 **Survey of UPP-mediated biofilm formation across environmental conditions.** *R.*  
257 *palustris* is metabolically versatile, allowing it to adopt distinct lifestyles to thrive under diverse  
258 conditions. When growing anaerobically in light, *R. palustris* performs anoxygenic  
259 photosynthesis to transform energy (27). During phototrophic growth, *R. palustris* can obtain  
260 carbon by consuming organic substrates (photoheterotrophy), or by fixing CO<sub>2</sub>,  
261 (photoautotrophy) (27). It can also grow by aerobic respiration in the dark (chemoheterotrophy).

262 Additionally, *R. palustris* is a diazotroph, meaning it can grow with N<sub>2</sub> gas as the sole nitrogen  
263 source, by the process of N<sub>2</sub>-fixation (45). While *R. palustris* has almost exclusively been studied  
264 under freshwater conditions, it was recently noted that an environmental isolate could grow in  
265 salt concentrations of up to 4.5% (46).

266 The metabolic versatility of *R. palustris* provided an opportunity to assess whether UPP-  
267 mediated surface attachment and biofilm formation is favored by some growth conditions over  
268 others. To address this, we examined UPP production and biofilm formation under various  
269 growth conditions for both WT *R. palustris* and the  $\Delta uppE$  mutant. We proceeded with only the  
270  $\Delta uppE$  mutant because we did not observe any phenotypic differences between the  $\Delta uppE$  and  
271  $\Delta uppC$  mutants (Fig. 2). We chose growth conditions that encompass both the metabolic  
272 capabilities of *R. palustris* (e.g. N<sub>2</sub>-fixation, photoautotrophy) and abiotic conditions it might  
273 normally encounter (e.g. low P<sub>i</sub>, high salinity). Total WGA-488 fluorescence values were not  
274 compared across conditions as they were not always reflective of UPP synthesis. For example,  
275 some growth conditions, such as low P<sub>i</sub>, resulted in occasional staining at both poles and at what  
276 appeared to be cell division septa, suggesting that WGA-488 was staining *N*-acetylglucosamine  
277 moieties in peptidoglycan (Fig. S2).

278 ***UPP-assisted biofilm formation is favored by *R. palustris* in adverse photoheterotrophic***  
279 ***environments.*** We first examined if biofilm formation was stimulated or inhibited in response to  
280 three adverse photoheterotrophic conditions. These conditions are considered to be less favorable  
281 for *R. palustris* growth due to nutrient limitation (low P<sub>i</sub>), less-preferred nutrients (N<sub>2</sub>-fixation),  
282 or osmotic stress (high salinity). Thus, we used these conditions to assess whether biofilm  
283 formation might function to increase *R. palustris* survival in suboptimal conditions or to foster  
284 persistence in favorable environments (2, 47). We also examined if UPP is utilized by *R.*

285 *palustris* across these growth conditions. Two main trends were observed under all three adverse  
286 conditions. First, WT *R. palustris* formed more biofilm under all adverse conditions compared to  
287 standard photoheterotrophic conditions (Fig. 3A), even though standard conditions supported the  
288 fastest growth rates and highest cell densities (data not shown). Second, UPP contributed to  
289 biofilm formation under all photoheterotrophic conditions, as WT formed more biofilm than the  
290  $\Delta uppE$  mutant in each case (Fig. 3A). These biofilm trends were consistent with microscopy  
291 results, which showed that WT *R. palustris* exhibited comparable WGA staining patterns under  
292 standard and adverse photoheterotrophic conditions (Fig. 3B). Beyond this, there were also  
293 condition-specific phenotypes observed.

294 Under low  $P_i$  conditions, the  $\Delta uppE$  mutant formed loosely-attached lawns at the bottom  
295 of microtiter wells. These lawns were easily disrupted and washed away. Such lawns were not  
296 formed by the  $\Delta uppE$  mutant under standard conditions and were unlike all WT  
297 photoheterotrophic biofilms, which were firmly-attached to the sides and bottom of the wells.  
298 The genetic and biochemical basis for these loose biofilms remains to be determined. Stimulation  
299 of biofilm formation in response to  $P_i$  limitation has also been observed in *A. tumefaciens* (12,  
300 48). This common observation raises the possibility that increased biofilm formation is a  
301 conserved response to  $P_i$  limitation across some *Rhizobiales* species. It has been speculated that  
302 low  $P_i$  serves as a signal to *A. tumefaciens* that plant surfaces are nearby, as plants sequester  $P_i$ ,  
303 locally depleting it from the rhizosphere (48). Given that no symbiotic association between *R.*  
304 *palustris* and plants has been identified, it is possible that biofilm formation serves a different  
305 function in this species, such as increasing survival when essential nutrients such as  $P_i$  are  
306 limiting.

307 We also observed 2-fold higher biofilm levels by WT under N<sub>2</sub>-fixing conditions  
308 compared to standard conditions (Fig. 3A). N<sub>2</sub> fixation is energetically expensive compared to  
309 using other nitrogen sources such as NH<sub>4</sub><sup>+</sup> and is therefore tightly regulated (45, 49). We  
310 hypothesize that increased aggregation under N<sub>2</sub>-fixing conditions might function to help retain  
311 costly NH<sub>4</sub><sup>+</sup>, which can passively diffuse out of cells as NH<sub>3</sub> (50).

312 In contrast to all other photoheterotrophic conditions, *ΔuppE* mutant biofilm levels were  
313 13-fold higher under 1.5% sea salt conditions than WT cells under standard conditions, despite  
314 lacking UPP (Fig. 3A). Similar trends were seen with 1.5% NaCl, confirming that the enhanced  
315 biofilm formation of both the WT and the *ΔuppE* mutant was due to high salinity and not another  
316 component of the sea salt supplement (Fig. 3C). The high *ΔuppE* mutant biofilm levels under  
317 high salinity conditions suggests that additional factors besides UPP contribute to this response.  
318 Thus, while UPP-mediated surface attachment contributes to robust biofilm formation by *R.*  
319 *palustris* during photoheterotrophic growth, UPP is less crucial under high salinity conditions.

320 ***UPP-independent biofilm formation is stimulated by non-photoheterotrophic conditions.*** We  
321 also examined UPP production and biofilm formation under chemoheterotrophic and  
322 photoautotrophic conditions. Under chemoheterotrophic conditions, UPP was not necessary for  
323 biofilm formation, as WT and the *ΔuppE* mutant formed similar levels of biofilm. We were  
324 surprised by this result, as it suggested that biofilm formation was entirely UPP-independent.  
325 Aerobically-grown bacteria typically adhere near the air-liquid interface (35). However, the  
326 adherent biomass of both the WT and the *ΔuppE* aerobic biofilms was at the bottom of the  
327 microtiter well, suggesting that *R. palustris* might preferentially form biofilms at microaerobic or  
328 anaerobic zones. In support of this, the adherent biomass was pigmented, indicating production of  
329 bacteriochlorophyll and carotenoids, which is stimulated in response to low O<sub>2</sub> (51).

330 Additionally, chemoheterotrophic conditions seem to favor biofilm formation, as WT and  $\Delta uppE$   
331 biofilm levels were approximately 12-fold higher relative to WT under standard  
332 photoheterotrophic conditions. (Fig. 3A). Separately, although WGA-488 staining was observed  
333 on some single cells, we did not observe any rosettes under chemoheterotrophic conditions (Fig.  
334 3B). It is therefore possible that UPP is produced but is dispensable for chemoheterotrophic  
335 biofilm formation.

336         During photoautotrophy with sodium bicarbonate as the carbon source and thiosulfate as  
337 an electron donor, *R. palustris* has a specific growth rate approximately  $\frac{1}{4}$  that of during  
338 photoheterotrophic growth (29, 52). Because of the slower growth, we extended  
339 photoautotrophic incubations from 4 d to 10 d to allow cultures to reach similar final densities as  
340 those observed after 4 d of photoheterotrophic growth. As a control, we also grew parallel  
341 photoheterotrophic cultures with equivalent amounts of carbon and electrons for 10 d (Fig. 3D).  
342 Under photoautotrophic conditions, WT and the  $\Delta uppE$  mutant showed similar levels of biofilm  
343 formation (Fig. 3D), suggesting that biofilm formation was UPP-independent. Similar trends  
344 were seen after 10 d of photoheterotrophic growth (Fig. 3D), unlike results from 4 d  
345 photoheterotrophic experiments, where the  $\Delta uppE$  mutant formed less biofilm than WT (Fig.  
346 3A). After 8 d of photoautotrophic growth we observed WT rosettes that stained very little or not  
347 at all with WGA-488, suggesting that less UPP is produced or that UPP composition is different  
348 under these conditions (Fig. 3B). UPP is thought to mediate the initial irreversible surface  
349 attachment of cells, so extending the incubation time might have allowed for accessory adhesins  
350 or other factors, such as DNA release following cell lysis, to facilitate attachment. Such factors  
351 could also contribute to the increased biofilm formation observed across the different conditions  
352 tested herein.



353 Overall, our survey of *R. palustris* biofilm formation across growth conditions can be  
354 summarized as follows. UPP mediates biofilm formation under photoheterotrophic conditions,  
355 especially those photoheterotrophic conditions that are less favorable to growth. Certain  
356 photoheterotrophic conditions, such as high salinity, involve additional factors that are  
357 independent of UPP. Finally, chemoheterotrophic and photoautotrophic conditions also stimulate  
358 biofilm formation, but in a manner that appears to be entirely independent of UPP.

359 **Conservation of core *upp* biosynthesis genes across *Rhizobiales* species.** Beyond *C.*  
360 *crescentus*, *R. leguminosarum*, *A. tumefaciens*, and now *R. palustris*, the characterization of polar  
361 adhesins in other  $\alpha$ -proteobacteria has been cursory. Historically, all polar adhesins were  
362 referred to as holdfast. However, designation of  $\alpha$ -proteobacterial adhesins has been complicated  
363 by functional differences. For example, the polar glucomannan adhesin of *R. leguminosarum*  
364 plays a unique role in root hair attachment but is not required for attachment to abiotic surfaces  
365 (19, 20). The *R. leguminosarum* glucomannan biosynthesis gene cluster is orthologous to the *A.*  
366 *tumefaciens uppABCDEF* cluster, which *A. tumefaciens* uses to attach to both biotic and abiotic  
367 surfaces (5, 11, 12). Thus, polar *R. leguminosarum* glucomannan and *A. tumefaciens* UPP are  
368 homologous adhesins with functional differences. Also contributing to the ambiguity in  
369 classifying previously identified *Rhizobiales* polar adhesins is the compositional diversity (1, 12,  
370 20–22). For example, *A. tumefaciens* UPP contains *N*-acetylgalactosamine in addition to *N*-  
371 acetylglucosamine (12), the *R. leguminosarum* glucomannan adhesin contains primarily glucose  
372 and mannose (19); the *Bradyrhizobium japonicum* polar adhesin contains galactose and lactose  
373 (22), and the *Hyphomicrobium* polar adhesin likely contains galactose and mannose (21). We  
374 therefore propose that  $\alpha$ -proteobacterial adhesins be classified according to genetic synteny.

375 Based on the synteny (Fig. 1) and functional requirement of *upp* orthologs for adhesin  
376 production (Fig. 2), we conclude that *R. palustris* produces UPP.

377 With the criterion of genetic synteny in mind, we explored the phylogenetic distribution  
378 and genomic organization of the core *uppABCDEF* orthologs across 22 *Rhizobiales* species,  
379 representing the lifestyle diversity of this clade (Fig. 4). The topology of this tree is largely  
380 consistent with the *α-proteobacteria* phylogeny inferred from a concatenation of 104 protein  
381 alignments (53). Our analysis revealed broad conservation of putative *upp* gene clusters,  
382 indicating that UPP is an ancestral trait of the *Rhizobiales* clade. Almost all of the *Rhizobiales*  
383 plant symbionts, including the plant pathogen, *A. tumefaciens*, the root-nodulating diazotrophs,  
384 *R. leguminosarum*, *S. meliloti*, *Mesorhizobium loti*, and *B. japonicum*, the stem-nodulating  
385 photosynthetic diazotroph, *Bradyrhizobium* sp. BTAi, and the leaf epiphyte, *Methylobacterium*  
386 *extorquens*, encode complete or near complete *upp* gene clusters (Fig. 4). The exception to this  
387 trend is the root-nodulating diazotroph, *Azorhizobium caulinodans* (54), which does not encode a  
388 *upp* cluster (Fig. 4, Dataset S2). We were also unable to identify a *upp* cluster in *Xanthobacter*  
389 *autotrophicus*, a free-living diazotroph closely related to *A. caulinodans* (Fig. 4). This absence  
390 suggests that the *upp* cluster was lost before these lineages split. Despite the absence of a *upp*  
391 cluster in *A. caulinodans*, it still appear to produce a polar adhesin and forms rosettes (25). Upon  
392 closer examination of the *A. caulinodans* ORS571 genome, we identified a putative Wzy-like  
393 polysaccharide biosynthesis gene cluster with high similarity to the *Vibrio fischeri* symbiosis  
394 polysaccharide (*syp*) locus (Dataset S3) (55). These putative *syp* homologs seem to have been  
395 acquired horizontally and might have been co-opted for polar polysaccharide synthesis in *A.*  
396 *caulinodans*.

397           While UPP is well-conserved in plant-associating *Rhizobiales* species, the opposite is true  
398 for animal pathogens. This trend was first noted upon the initial discovery of the *upp* gene cluster  
399 in *R. leguminosarum*, which noted that this cluster is absent in the *Rhizobiales* intracellular  
400 mammalian pathogen, *Brucella melitensis* (20). Rather than being entirely absent (20), our data  
401 corroborates more recent bioinformatic evidence that *Brucella* spp. encode a cluster of 3 putative  
402 *upp* orthologs (*uppBCE*) (Fig. 4, Fig. S1, Dataset S2) (23). It is not known whether this partial  
403 *upp* cluster is involved in the synthesis of a functional UPP. In the closely related intracellular  
404 animal pathogens of the genera *Bartonella*, *upp* orthologs are completely absent (Fig. 4, Dataset  
405 S2). In contrast, the soil-dwelling, opportunistic human pathogen *Ochrobactrum anthropi* (56),  
406 which is more closely related to *Brucella* than *Bartonella*, encodes a complete *uppABCDEF* gene  
407 cluster (Fig. 4). *Ochrobactrum* spp. are thought to be rhizosphere community members but are  
408 capable of infecting animal hosts (56, 57). We hypothesize that the entire *upp* cluster was first  
409 lost in the *Bartonella* lineage during adaptation to an intracellular lifestyle after diverging from  
410 *Brucella/Ochrobactrum*. More recently the *Brucella* lineage has similarly lost multiple *upp*  
411 orthologs during its transition to becoming intracellular pathogens. The independent loss of *upp*  
412 orthologs in both *Bartonella* and *Brucella* suggests convergent evolution upon adaptation to  
413 intracellular niches within animal hosts, supporting the hypothesis that UPP is not important for  
414 such lifestyles. Conversely, the conservation of *upp* orthologs in plant-symbionts and free-living  
415 species suggests UPP is beneficial in other diverse environments. Considering this, we  
416 hypothesize that *Ochrobactrum anthropi* has retained the complete *upp* cluster because it is  
417 typically free-living in the soil and thus benefits from producing UPP.

418           Unipolar adhesins are also used by  $\alpha$ -proteobacteria outside of the *Rhizobiales*. In the  
419 order Caulobacterales, *hfs* and *hfa* gene clusters for holdfast synthesis are well conserved (17,

420 43). Despite the differences in synteny between the *upp* and *hfs* gene clusters (Fig S1), both  
421 encode Wzy-dependent pathways for polar polysaccharide synthesis and export and *uppC* and  
422 *uppE* show sequence similarity to *hfsD* and *hfsE*, respectively (Table S1). Because of these  
423 similarities, we hypothesize that holdfast and UPP share a common evolutionary origin and that  
424 the *upp* and *hfs* loci diversified in genomic organization following the divergence of the  
425 *Rhizobiales* and *Caulobacterales* clades.

426 Other  $\alpha$ -proteobacterial species of the marine ‘Roseobacter’ clade within the order  
427 *Rhodobacterales* also produce polar adhesins and form rosettes but do not encode either *upp* or  
428 *hfs/hfa* homologs (18) (Dataset S1 & S2). The polar polysaccharide adhesin of the Roseobacter  
429 species *Phaeobacter inhibens* contains *N*-acetylglucosamine based on WGA-binding, indicating  
430 that the biochemical composition is at least somewhat similar to UPP and holdfast (44). In this  
431 case, polar adhesion synthesis is encoded on a plasmid, since plasmid curing prevented *P.*  
432 *inhibens* rosette formation and diminished attachment to abiotic surfaces and algal cells (6).  
433 Furthermore, genetic disruption of the plasmid-encoded putative rhamnose operon lowered  
434 biofilm formation (58). Plasmids encoding putative rhamnose operons are widely distributed  
435 among other Roseobacter species (58), suggesting that polar polysaccharide synthesis and export  
436 in this clade is genetically distinct from that of UPP and holdfast. It is not clear whether  
437 acquisition of these plasmids led to the loss of gene clusters similar to either *upp* or *hfs* loci.

438 While polar polysaccharide adhesins are a common morphological trait across  
439 ecologically diverse  $\alpha$ -proteobacteria, there is considerable genetic, compositional, and  
440 functional variation, which likely reflects adaptation to different niches. We propose here that  
441 genetic synteny of biosynthetic loci is a suitable criterion on which to base classification of polar  
442 adhesins. This criterion bypasses uncertainty arising from compositional differences while

443 highlighting the shared underlying biosynthetic pathway. As such, holdfast and UPP are distinct  
444 adhesins despite facile similarities. Likewise, the *A. caulinodans* adhesin and the *Roseobacter*  
445 rhamnose adhesins should each receive their own designation, as they are genetically distinct  
446 from both holdfast and UPP, as well as from each other. Adoption of a unified classification  
447 scheme will facilitate both the comparison of adhesins and the exploration of functional  
448 differences within and between adhesin types.

#### 449 **ACKNOWLEDGEMENTS**

450 We thank Yves Brun for use of microscopy facilities and reagents, Clay Fuqua for sharing  
451 unpublished data, and members of the Brun and Fuqua labs for thoughtful discussions.

#### 452 **FUNDING INFORMATION**

453 This work was supported in part by the U.S. Department of Energy, Office of Science, Office of  
454 Biological and Environmental Research, under Award Number DE-SC0008131 and the Indiana  
455 University College of Arts & Sciences.

456

#### 457 **REFERENCES**

- 458 1. **Berne C, Ducret A, Hardy GG, Brun Y V.** 2015. Adhesins Involved in Attachment to  
459 Abiotic Surfaces by Gram-Negative Bacteria. *Microbiol Spectr* **3**:1–45.
- 460 2. **Petrova OE, Sauer K.** 2012. Sticky situations: Key components that control bacterial  
461 surface attachment. *J Bacteriol* **194**:2413–2425.
- 462 3. **Braun AC, Elrod RP.** 1946. Stages in the life history of *Phytomonas tumefaciens*. *J*  
463 *Bacteriol* **52**:695–702.

- 464 4. **ZoBell CE**. 1943. The Effect of Solid Surfaces Upon Bacterial Activity. *J Bacteriol*  
465 **46**:39–56.
- 466 5. **Li G, Brown PJB, Tang JX, Xu J, Quardokus EM, Fuqua C, Brun Y V**. 2012. Surface  
467 contact stimulates the just-in-time deployment of bacterial adhesins. *Mol Microbiol*  
468 **83**:41–51.
- 469 6. **Frank O, Michael V, Päuker O, Boedeker C, Jogler C, Rohde M, Petersen J**. 2015.  
470 Plasmid curing and the loss of grip - The 65-kb replicon of *Phaeobacter inhibens* DSM  
471 17395 is required for biofilm formation, motility and the colonization of marine algae.  
472 *Syst Appl Microbiol* **38**:120–127.
- 473 7. **Merker RI, Smit J**. 1988. Characterization of the Adhesive Holdfast of Marine and  
474 Freshwater *Caulobacters*. *Appl Envir Microbiol* **54**:2078–2085.
- 475 8. **Smith CS, Hinz A, Bodenmiller D, David E, Brun Y V, Larson DE**. 2003.  
476 Identification of Genes Required for Synthesis of the Adhesive Holdfast in *Caulobacter*  
477 *crenscentus*. *J Bacteriol* **185**:1432–1442.
- 478 9. **Bodenmiller D, Toh E, Brun Y V**. 2004. Development of Surface Adhesion in  
479 *Caulobacter crenscentus*. *J Bacteriol* **186**:1438–1447.
- 480 10. **Fiebig A, Herrou J, Fumeaux C, Radhakrishnan SK, Viollier PH, Crosson S**. 2014. A  
481 Cell Cycle and Nutritional Checkpoint Controlling Bacterial Surface Adhesion. *PLoS*  
482 *Genet* **10**:e1004101
- 483 11. **Tomlinson AD, Fuqua C**. 2009. Mechanisms and regulation of polar surface attachment  
484 in *Agrobacterium tumefaciens*. *Curr Opin Microbiol* **12**:708–714.

- 485 12. **Xu J, Kim J, Danhorn T, Merritt PM, Fuqua C.** 2012. Phosphorus limitation increases  
486 attachment in *Agrobacterium tumefaciens* and reveals a conditional functional redundancy  
487 in adhesin biosynthesis. *Res Microbiol* **163**:674–684.
- 488 13. **Xu J, Kim J, Koestler BJ, Choi JH, Waters CM, Fuqua C.** 2013. Genetic analysis of  
489 *Agrobacterium tumefaciens* unipolar polysaccharide production reveals complex  
490 integrated control of the motile-to-sessile switch. *Mol Microbiol* **89**:929–948.
- 491 14. **Poindexter JS.** 1964. Biological Properties and Classification of the *Caulobacter* Group.  
492 *Bacteriol Rev* **28**:231–295.
- 493 15. **Toh E, Kurtz HD, Brun Y V.** 2008. Characterization of the *Caulobacter crescentus*  
494 holdfast polysaccharide biosynthesis pathway reveals significant redundancy in the  
495 initiating glycosyltransferase and polymerase steps. *J Bacteriol* **190**:7219–7231.
- 496 16. **Hardy GG, Allen RC, Toh E, Long M, Brown PJB, Cole-Tobian JL, Brun Y V.** 2010.  
497 A localized multimeric anchor attaches the *Caulobacter* holdfast to the cell pole. *Mol*  
498 *Microbiol* **76**:409–427.
- 499 17. **Wan Z, Brown PJB, Elliott EN, Brun Y V.** 2013. The adhesive and cohesive properties  
500 of a bacterial polysaccharide adhesin are modulated by a deacetylase. *Mol Microbiol*  
501 **88**:486–500.
- 502 18. **Slightom RN, Buchan A.** 2009. Surface Colonization by Marine Roseobacters:  
503 Integrating Genotype and Phenotype. *Appl Environ Microbiol* **75**:6027–6037.
- 504 19. **Laus MC, Logman TJ, Lamers GE, Van Brussel AAN, Carlson RW, Kijne JW.**  
505 2006. A novel polar surface polysaccharide from *Rhizobium leguminosarum* binds host

- 506 plant lectin. *Mol Microbiol* **59**:1704–1713.
- 507 20. **Williams A, Wilkinson A, Krehenbrink M, Russo DM, Zorreguieta A, Downie JA.**  
508 2008. Glucomannan-mediated attachment of *Rhizobium leguminosarum* to pea root hairs  
509 is required for competitive nodule infection. *J Bacteriol* **190**:4706–4715.
- 510 21. **Moore RL, Marshall KC.** 1981. Attachment and Rosette Formation by Hyphomicrobia.  
511 *Appl Environ Microbiol* **42**:751–757.
- 512 22. **Loh JT, Ho SC, de Feijter a W, Wang JL, Schindler M.** 1993. Carbohydrate binding  
513 activities of *Bradyrhizobium japonicum*: unipolar localization of the lectin BJ38 on the  
514 bacterial cell surface. *Proc Natl Acad Sci U S A* **90**:3033–7.
- 515 23. **Williams M, Hoffman MD, Daniel JJ, Madren SM, Dhroso A, Korkin D, Givan SA,**  
516 **Jacobson SC, Brown PJB.** 2016. Short-Stalked *Prosthecomicrobium hirschii* Cells have  
517 a *Caulobacter*-like Cell Cycle. *J Bacteriol* **198**:1149–1159.
- 518 24. **Schäper S, Krol E, Skotnicka D, Kaefer V, Hilker R, Becker A.** 2016. Cyclic Di-GMP  
519 Regulates Multiple Cellular Functions in the Symbiotic Alphaproteobacterium  
520 *Sinorhizobium meliloti*. *J Bacteriol* **198**:521–535.
- 521 25. **Liu C, Lee K, Wang Y, Peng M, Lee K, Suzuki S, Suzuki T, Oyaizu H.** 2011.  
522 Involvement of the Azorhizobial Chromosome Partition Gene (*parA*) in the Onset of  
523 Bacteroid Differentiation during *Sesbania rostrata* Stem Nodule Development. *Appl*  
524 *Environ Microbiol* **77**:4371–4382.
- 525 26. **Whittenbury R, McLee AG.** 1967. *Rhodospseudomonas palustris* and *Rh. viridis*--  
526 Photosynthetic Budding Bacteria. *Arch Mikrobiol* **334**:324–334.



- 527 27. **Larimer FW, Chain P, Hauser L, Lamerdin J, Malfatti S, Do L, Land ML, Pelletier**  
528 **DA, Beatty JT, Lang AS, Tabita FR, Gibson JL, Hanson TE, Bobst C, Torres JLTY,**  
529 **Peres C, Harrison FH, Gibson J, Harwood CS.** 2004. Complete genome sequence of  
530 the metabolically versatile photosynthetic bacterium *Rhodopseudomonas palustris*. Nat  
531 Biotechnol **22**:55–61.
- 532 28. **Kim M, Harwood C.** 1991. Regulation of benzoate-CoA ligase in *Rhodopseudomonas*  
533 *palustris*. FEMS Microbiol Lett **83**:199–203.
- 534 29. **Rey FE, Oda Y, Harwood CS.** 2006. Regulation of uptake hydrogenase and effects of  
535 hydrogen utilization on gene expression in *Rhodopseudomonas palustris*. J Bacteriol  
536 **188**:6143–6152.
- 537 30. **Quandt J, Hynes MF.** 1993. Versatile suicide vectors which allow direct selection for  
538 gene replacement in Gram-negative bacteria. Gene **127**:15–21.
- 539 31. **Simon R, Priefer U, Pühler A.** 1983. A Broad Host Range Mobilization System for *in*  
540 *vivo* Genetic Engineering: Transposon Mutagenesis in Gram Negative Bacteria. Nat  
541 Biotechnol **1**:784–791.
- 542 32. **Pelletier DA, Hurst GB, Foote LJ, Lankford PK, Mckeown CK, Lu T, Schmoyer DD,**  
543 **Shah MB, Iv WJH, Mcdonald WH, Hooker BS, Cannon WR, Daly DS, Gilmore JM,**  
544 **Wiley HS, Auberry ODL, Wang Y, Larimer FW, Kennel SJ, Doktycz MJ, Morrell-**  
545 **falvey JL, Owens ET, Buchanan M V.** 2008. A General System for Studying Protein-  
546 Protein Interactions in Gram-Negative Bacteria research articles. J Proteome Res **7**:3319–  
547 3328.
- 548 33. **McKinlay JB, Harwood CS.** 2010. Carbon dioxide fixation as a central redox cofactor

- 549 recycling mechanism in bacteria. *Proc Natl Acad Sci U S A* **107**:11669–11675.
- 550 34. **Schindelin J, Arganda-Carreras I, Frise E, Kaynig V, Longair M, Pietzsch T,**  
551 **Preibisch S, Rueden C, Saalfeld S, Schmid B, Tinevez J-Y, White DJ, Hartenstein V,**  
552 **Eliceiri K, Tomancak P, Cardona A.** 2012. Fiji: an open-source platform for biological-  
553 image analysis. *Nat Methods* **9**:676–682.
- 554 35. **O’Toole GA, Pratt LA, Watnick PI, Newman DK, Weaver VB, Kolter R.** 1999.  
555 Genetic Approaches to Study of Biofilms. *Methods Enzym* **310**:91–109.
- 556 36. **Edgar RC.** 2004. MUSCLE : multiple sequence alignment with high accuracy and high  
557 throughput. *Nucleic Acids Res* **32**:1792–1797.
- 558 37. **Tamura K, Stecher G, Peterson D, Filipinski A, Kumar S.** 2013. MEGA6: Molecular  
559 Evolutionary Genetics Analysis Version 6.0. *Mol Biol Evol* **30**:2725–2729.
- 560 38. **Castresana J.** 2000. Selection of Conserved Blocks from Multiple Alignments for Their  
561 Use in Phylogenetic Analysis. *Mol Biol Evol* **17**:540–552.
- 562 39. **Le SQ, Gascuel O.** 2008. An Improved General Amino Acid Replacement Matrix. *Mol*  
563 *Biol Evol* **25**:1307–1320.
- 564 40. **Westmacott D, Primrose SB.** 1976. Synchronous growth of *Rhodospseudomonas*  
565 *palustris* from the swarmer phase. *J Gen Microbiol* **94**:117–125.
- 566 41. **Cuthbertson L, Mainprize IL, Naismith JH, Whitfield C.** 2009. Pivotal roles of the  
567 outer membrane polysaccharide export and polysaccharide copolymerase protein families  
568 in export of extracellular polysaccharides in gram-negative bacteria. *Microbiol Mol Biol*  
569 *Rev* **73**:155–177.

- 570 42. **Whitfield C.** 2006. Biosynthesis and Assembly of Capsular Polysaccharides. *Annu Rev*  
571 *Biochem* **75**:39–68.
- 572 43. **Brown PJB, Hardy GG, Trimble MJ, Brun Y V.** 2008. Complex Regulatory Pathways  
573 Coordinate Cell-Cycle Progression and Development in *Caulobacter crescentus*. *Adv*  
574 *Microb Physiol* **54**:1–101.
- 575 44. **Segev E, Tellez A, Vlamakis H, Kolter R.** 2015. Morphological heterogeneity and  
576 attachment of *Phaeobacter inhibens*. *PLoS One* **10**:1–12.
- 577 45. **Oda Y, Samanta SK, Rey FE, Liu X, Yan T, Zhou J, Caroline S, Wu L, Harwood**  
578 **CS.** 2005. Functional Genomic Analysis of Three Nitrogenase Isozymes in the  
579 Photosynthetic Bacterium *Rhodopseudomonas palustris*. *J Bacteriol* **187**:7784–7794.
- 580 46. **Adessi A, Concato M, Sanchini A, Rossi F, de Philippis R.** 2016. Hydrogen production  
581 under salt stress conditions by a freshwater *Rhodopseudomonas palustris* strain. *Appl*  
582 *Microbiol Biotechnol* **100**:2917–2926.
- 583 47. **Jefferson KK.** 2004. What drives bacteria to produce a biofilm? *FEMS Microbiol Lett*  
584 **236**:163–173.
- 585 48. **Danhorn T, Hentzer M, Givskov M, Parsek MR, Fuqua C.** 2004. Phosphorus  
586 Limitation Enhances Biofilm Formation of the Plant Pathogen *Agrobacterium tumefaciens*  
587 through the PhoR-PhoB Regulatory System. *J Bacteriol* **186**:4492–4501.
- 588 49. **Heiniger EK, Oda Y, Samanta SK, Harwood CS.** 2012. How Posttranslational  
589 Modification of Nitrogenase Is Circumvented in *Rhodopseudomonas palustris* Strains  
590 That Produce Hydrogen Gas Constitutively. *Appl Environ Microbiol* **78**:1023–1032.

- 591 50. **Kim M, Zhang Z, Okano H, Yan D, Groisman A, Hwa T.** 2012. Need-based activation  
592 of ammonium uptake in *Escherichia coli*. *Mol Syst Biol* **8**:1–10.
- 593 51. **Rey FE, Harwood CS.** 2010. FixK, a global regulator of microaerobic growth, controls  
594 photosynthesis in *Rhodopseudomonas palustris*. *Mol Microbiol* **75**:1007–1020.
- 595 52. **Huang JJ, Heiniger EK, McKinlay JB, Harwood CS.** 2010. Production of hydrogen  
596 gas from light and the inorganic electron donor thiosulfate by *Rhodopseudomonas*  
597 *palustris*. *Appl Environ Microbiol* **76**:7717–7722.
- 598 53. **Williams KP, Sobral BW, Dickerman AW.** 2007. A robust species tree for the  
599 *Alphaproteobacteria*. *J Bacteriol* **189**:4578–4586.
- 600 54. **Lee K, De Backer P, Aono T, Liu C, Suzuki S, Suzuki T, Kaneko T, Yamada M,**  
601 **Tabata S, Kupfer DM, Najar FZ, Wiley GB, Roe B, Binnewies TT, Ussery DW,**  
602 **D’Haeze W, Herder J Den, Gevers D, Vereecke D, Holsters M, Oyaizu H.** 2008. The  
603 genome of the versatile nitrogen fixer *Azorhizobium caulinodans* ORS571. *BMC*  
604 *Genomics* **9**:271.
- 605 55. **Shibata S, Yip ES, Quirke KP, Ondrey JM, Visick KL.** 2012. Roles of the Structural  
606 Symbiosis Polysaccharide (*syp*) Genes in Host Colonization, Biofilm Formation, and  
607 Polysaccharide Biosynthesis in *Vibrio fischeri*. *J Bacteriol* **194**:6736–6747.
- 608 56. **Chain PSG, Lang DM, Comerci DJ, Malfatti SA, Vergez LM, Shin M, Ugalde RA,**  
609 **Garcia E, Tolmasky ME.** 2011. Genome of *Ochrobactrum anthropi* ATCC 49188<sup>T</sup>, a  
610 versatile opportunistic pathogen and symbiont of several eukaryotic hosts. *J Bacteriol*.
- 611 57. **Barquero-Calvo E, Conde-Alvarez R, Chacón-Díaz C, Quesada-Lobo L,**

- 612 **Martirosyan A, Guzmán-Verri C, Iriarte M, Mancek-Keber M, Jerala R, Gorvel JP,**  
613 **Moriyon I, Moreno E, Chaves-Olarte E.** 2009. The differential interaction of *Brucella*  
614 and *Ochrobactrum* with innate immunity reveals traits related to the evolution of stealthy  
615 pathogens. PLoS One 4:e5893.
- 616 58. **Michael V, Frank O, Bartling P, Scheuner C, Göker M.** 2016. Biofilm plasmids with a  
617 rhamnose operon are widely distributed determinants of the “swim-or-stick ” lifestyle in  
618 roseobacters. ISME J 10:2498–2513.
- 619 59. **LaSarre B, McCully AL, Lennon JT, Mckinlay JB.** 2016. Microbial mutualism  
620 dynamics governed by dose-dependent toxicity of cross-fed nutrients. ISME J 1–12.
- 621

622 **TABLES**

623 **Table 1. Strains and plasmids used in this study**

| Strain or plasmid   | Relevant Genotype and/or description                                                                         | Reference or source      |
|---------------------|--------------------------------------------------------------------------------------------------------------|--------------------------|
| <i>R. palustris</i> |                                                                                                              |                          |
| CGA009              | Wild-type strain                                                                                             | (27)                     |
| CGA4000             | CGA009 derivative; $\Delta uppE$ ( $\Delta RPA2750$ ) mutant                                                 | This study               |
| CGA4022             | CGA009 derivative; $\Delta uppC$ ( $\Delta RPA4833$ ) mutant                                                 | This study               |
| <i>E. coli</i>      |                                                                                                              |                          |
| S17-1               | <i>thi pro hdsR hdsM+ recA</i> ; chromosomal insertion of RP4-2 (Tc::Mu Km::Tn7)                             | (31)                     |
| DH5- $\alpha$       | $F^- \lambda^- recA1 \Delta(lacZYA-argF)U169 hsdR17 thi-1 gyrA96 supE44 endA1 relA1 \Phi 80 lacZ \Delta M15$ | Thermo Fisher Scientific |
| Plasmids            |                                                                                                              |                          |
| pJQ200KS            | $Gm^R$ ; <i>sacB</i> ; <i>R. palustris</i> suicide vector;                                                   | (30)                     |
| pJQ-RPA2750         | $Gm^R$ ; <i>sacB</i> ; Derived from pJQ200KS; deletion vector for <i>uppE</i> (RPA2750)                      | (59)                     |
| pJQ-RPA4833         | $Gm^R$ ; <i>sacB</i> ; Derived from pJQ200KS; deletion vector for <i>uppC</i> (RPA4833)                      | This study               |
| pGEM                | High-copy-number cloning vector for insertion of PCR products                                                | Promega                  |
| pBBPgdh             | $Gm^R$ ; Broad-host-range cloning vector with constitutive <i>R. palustris gapdh</i> promoter                | (33)                     |
| pBBP-RPA2750        | $Gm^R$ ; Derived from pBBPgdh; complementation vector for $\Delta uppE$ ( $\Delta RPA2750$ )                 | This study               |
| pBBP-RPA4833        | $Gm^R$ ; Derived from pBBPgdh; complementation vector for $\Delta uppC$ ( $\Delta RPA4833$ )                 | This study               |

624

625 **Table 2. Primers used in this study**

| Primer                           | Sequence (5' → 3')                                | Description ( <u>restriction site</u> )                                  |
|----------------------------------|---------------------------------------------------|--------------------------------------------------------------------------|
| <i>UuppE</i> -<br>XbaI           | CGCGGTGGCGGCCGCTCTAGAAAGCATCACGGATCTGTTC<br>GTCTG | <i>uppE</i> (RPA2750)<br>upstream flanking region;<br>( <u>XbaI</u> )    |
| <i>UuppE</i> -<br>delR           | GCGAACGCCTCAGTAGGTACCGCTGATCGGCTCCATCTGTT<br>CATG | <i>uppE</i> (RPA2750)<br>upstream in-frame<br>deletion reverse           |
| <i>DuppE</i> -<br>delF           | ATGGAGCCGATCAGCGGTACCTACTGAGGCGTTCGCTCTTC<br>AACA | <i>uppE</i> (RPA2750)<br>downstream in-frame<br>deletion forward         |
| <i>DuppE</i> -<br>BamHI          | TTCCTGCAGCCCGGGGGATCCAGAGCAACAACAACCAAA<br>GGGAGC | <i>uppE</i> (RPA2750)<br>downstream flanking<br>region; ( <u>BamHI</u> ) |
| <i>uppE</i> -<br>compF-<br>BamHI | CTGATCTAGAAGCACGGTGGATATGGATTCC                   | <i>uppE</i> (RPA2750)<br>complementation<br>forward; ( <u>BamHI</u> )    |
| <i>uppE</i> -<br>compR-<br>XbaI  | GACTGGATCCCCGGACGACAAAGTCGTG                      | <i>uppE</i> (RPA2750)<br>complementation reverse;<br>( <u>XbaI</u> )     |
| <i>UuppC</i> -<br>XbaI           | GACTTCTAGAACCCATTCGTGAGTGGCAACC                   | <i>uppC</i> (RPA4833)<br>upstream flanking region;<br>( <u>XbaI</u> )    |
| <i>UuppC</i> -<br>delR           | AGAACCAGCGTTCGATGATCATCGATACTTGAAACGCGC           | <i>uppC</i> (RPA4833)<br>upstream in-frame<br>deletion reverse           |
| <i>DuppC</i> -<br>delF           | GATGATCATCGAACGCTGGTTCTGAACCGG                    | <i>uppC</i> (RPA4833)<br>downstream in-frame<br>deletion forward         |
| <i>DuppC</i> -<br>BamHI          | GACTTCTAGACGGTTTCGAACTCGGGGGTTAT                  | <i>uppC</i> (RPA4833)<br>downstream flanking<br>region; ( <u>BamHI</u> ) |
| <i>uppC</i> -<br>compF-<br>BamHI | ACAGCGGGATCCCGTGGCGAGGGATGGC                      | <i>uppC</i> (RPA4833)<br>complementation<br>forward; ( <u>BamHI</u> )    |
| <i>uppC</i> -<br>compR-<br>XbaI  | ACAGCGTCTAGATCAGAACCAGCGTTCGCCGA                  | <i>uppC</i> (RPA4833)<br>complementation<br>reverse; ( <u>XbaI</u> )     |

626

627 **FIGURES AND FIGURE LEGENDS**

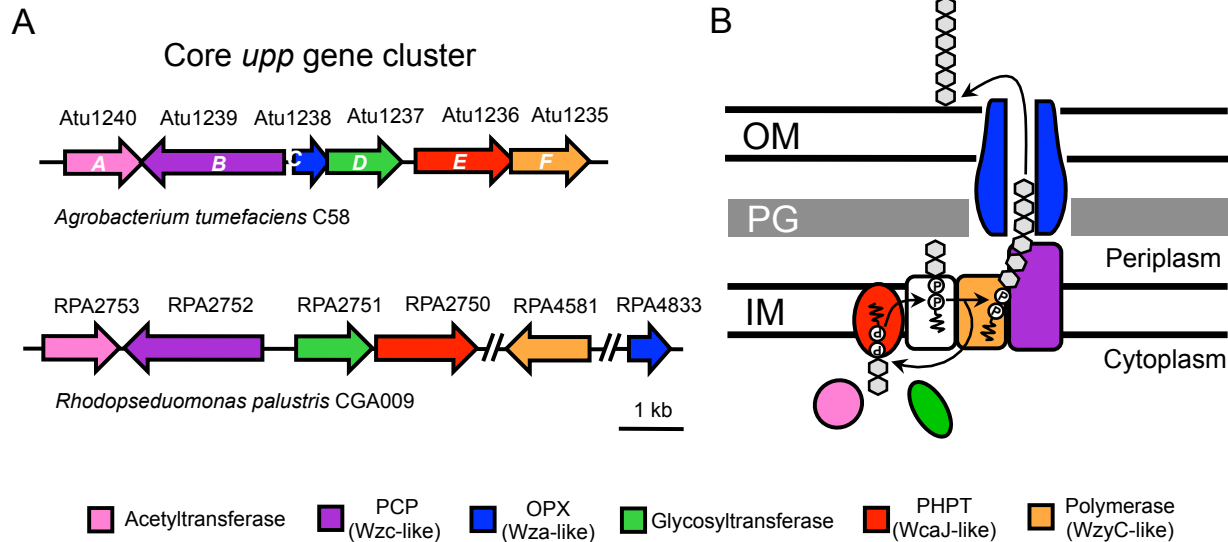



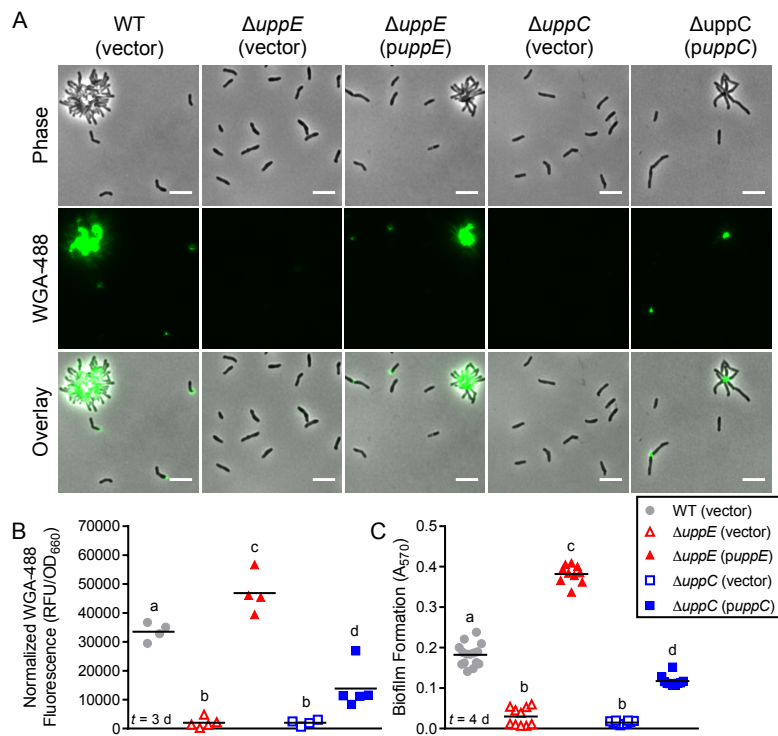

638

639 **FIG 2. *uppE* and *uppC* are required for UPP biosynthesis, cell-cell adhesion, and biofilm**  
640 **formation.** (A) Epifluorescence microscopy of cells stained with WGA-488 after 2 d of growth  
641 in standard photoheterotrophic conditions. Scale bars, 5  $\mu$ m. (B) Normalized total WGA-488  
642 fluorescence from batch UPP quantification following 3 d of growth in standard  
643 photoheterotrophic conditions. Different letters indicate significant differences between strains  
644 ( $P < 0.05$ ; One-way ANOVA followed by Tukey's multiple comparisons test;  $n=4-5$ ). (C)  
645 Biofilm formation levels ( $A_{570}$ ) were quantified by CV staining of adherent biomass following 4  
646 d of growth in microtiter wells under standard photoheterotrophic conditions. All strains grew  
647 equivalently, so  $A_{570}$  values were not normalized. Different letters indicate significant  
648 differences between strains ( $P < 0.0001$ ; One-way ANOVA followed by Tukey's multiple  
649 comparisons test;  $n=10$  or  $15$ , pooled from three independent experiments). (B,C) Symbols  
650 indicate biological replicates and lines indicate the means. Time ( $t$ ) of sampling following  
651 inoculation is indicated in lower left corner.

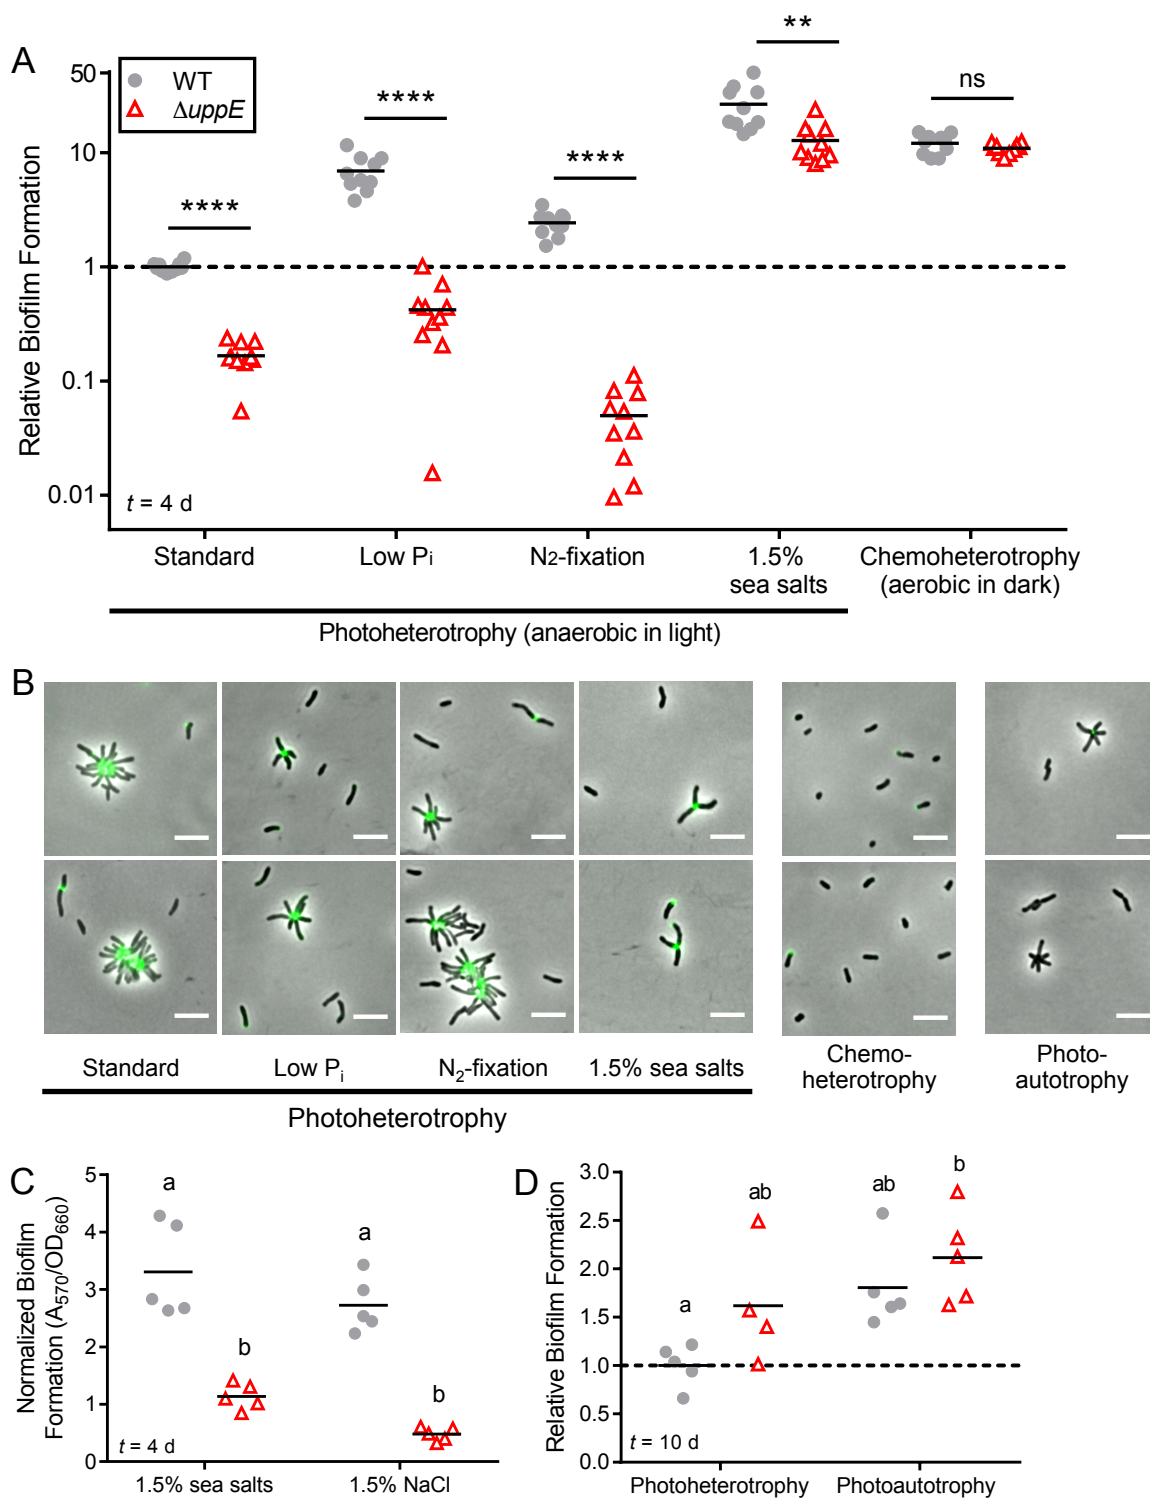

652

653

654 **FIG 3. UPP is important for biofilm formation across photoheterotrophic conditions. (A)**  
655 Biofilm formation levels were normalized to final planktonic cell density ( $A_{570}/OD_{660}$ ) and then  
656 made relative to normalized WT standard photoheterotrophic values, which was set to 1.  $**P <$   
657  $0.01$ ,  $****P < 0.0001$ ; ns, not significant; based on multiple unpaired, two-tailed t tests without  
658 assuming equal variance and followed by Holm-Šídák correction for multiple comparisons;  
659  $n=10$ , pooled from two independent experiments. Significance is only indicated for pairwise  
660 comparisons between WT and the  $\Delta uppE$  mutant within each condition because the assumption  
661 of homogeneity of variances was violated in comparisons across conditions. Results from other  
662 statistical analyses comparing across conditions are listed in Table S3. (B) Epifluorescence  
663 microscopy of cells stained with WGA-488 after 3 d of photoheterotrophic or  
664 chemoheterotrophic growth and after 8 d of photoautotrophic growth. Scale bars, 5  $\mu\text{m}$ . (C)  
665 Biofilm formation normalized to final planktonic cell density ( $A_{570}/OD_{660}$ ) following 4 d of  
666 photoheterotrophic growth with 1.5% sea salts or 1.5% NaCl. Different letters indicate  
667 significant differences between groups ( $P < 0.05$ ; Two-way ANOVA followed by Tukey's  
668 multiple comparisons test;  $n=5$ ). (D) Relative biofilm formation ( $A_{570}/OD_{660}$ ) after 10 d of  
669 photoheterotrophic or photoautotrophic growth, with WT values from standard  
670 photoheterotrophic conditions set to 1. Different letters indicate statistically significant  
671 differences between groups ( $P < 0.05$ ; Two-way ANOVA followed by Tukey's multiple  
672 comparisons test;  $n=4-5$ ). (A, C, D) Symbols indicate biological replicates and lines indicate the  
673 means. Time ( $t$ ) of sampling following inoculation is indicated in lower left corner.

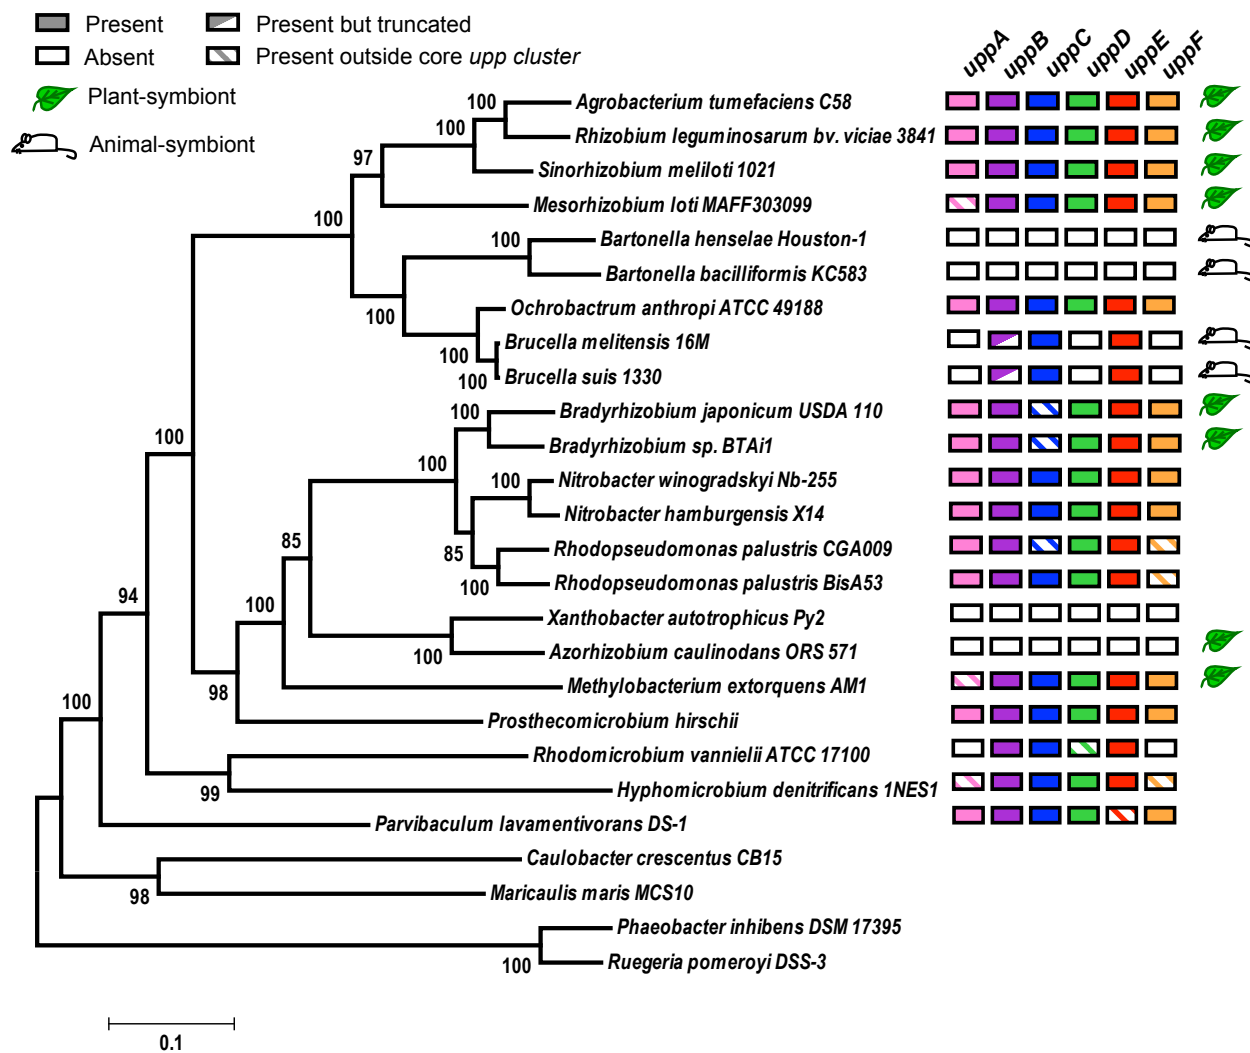

674

675 **FIG 4. Conservation of core UPP biosynthesis genes among *Rhizobiales* species.** A maximum

676 likelihood phylogeny was inferred based on a concatenated alignment of 6 conserved

677 housekeeping proteins using a LG+G+I substitution model (39) with four discrete gamma

678 categories and invariable sites in MEGA6 (37). The tree with the highest log likelihood is shown.

679 Node values indicate branch support from 100 bootstrap replicates. Scale bar represents the

680 number of substitutions per site along branches. Leaf and mouse symbols indicate known plant

681 and animal symbiotic relationships, respectively.

682

683  
684  
685  
686  
687  
688  
689

SUPPLEMENTAL FIGURES AND TABLES

**A *Rhizobiales*-specific unipolar polysaccharide adhesin contributes to *Rhodopseudomonas palustris* biofilm formation across diverse photoheterotrophic conditions**

Ryan K. Fritts, Breah LaSarre, Ari M. Stoner, Amanda L. Posto, and James B. McKinlay

Department of Biology, Indiana University, Bloomington, Indiana, USA

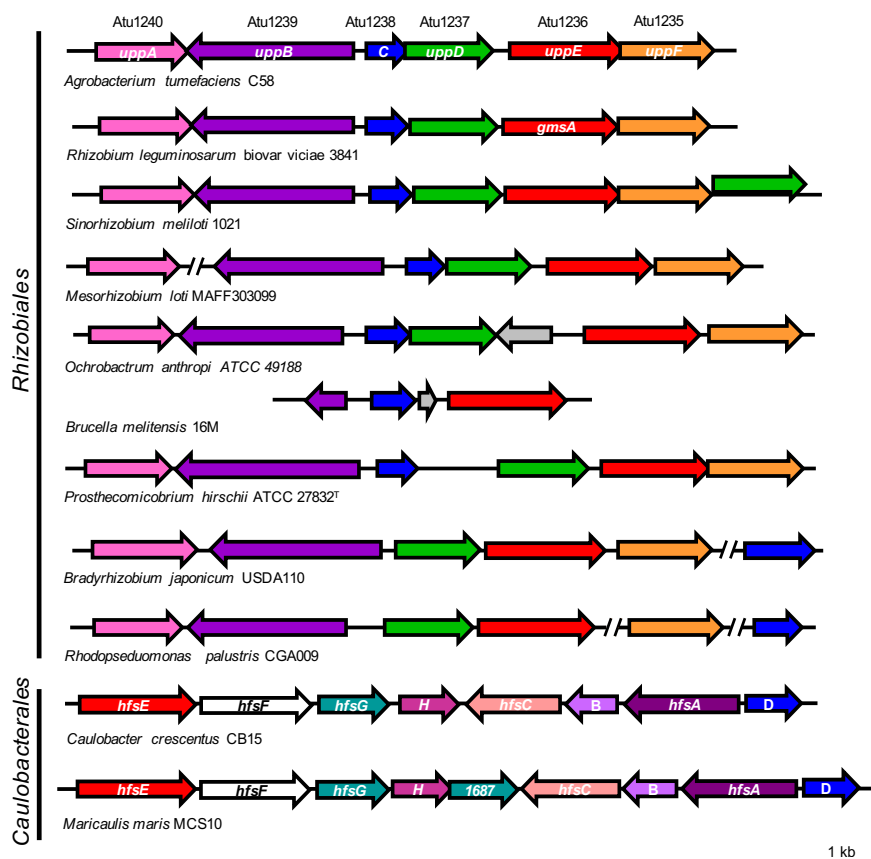

690  
691 **FIG S1. Conservation and synteny of core *upp* and *hfs* gene clusters.** Genes (arrows) are colored  
692 based on predicted homology and function such that genes of the same color are putative homologs.  
693 Genes without a predicted role in polysaccharide biosynthesis and export are shown in gray. Query cover,  
694 % Identities/Positives, and E values for and *hfs* and *upp* homologs can be found in Dataset S1 and S2,  
695 respectively.

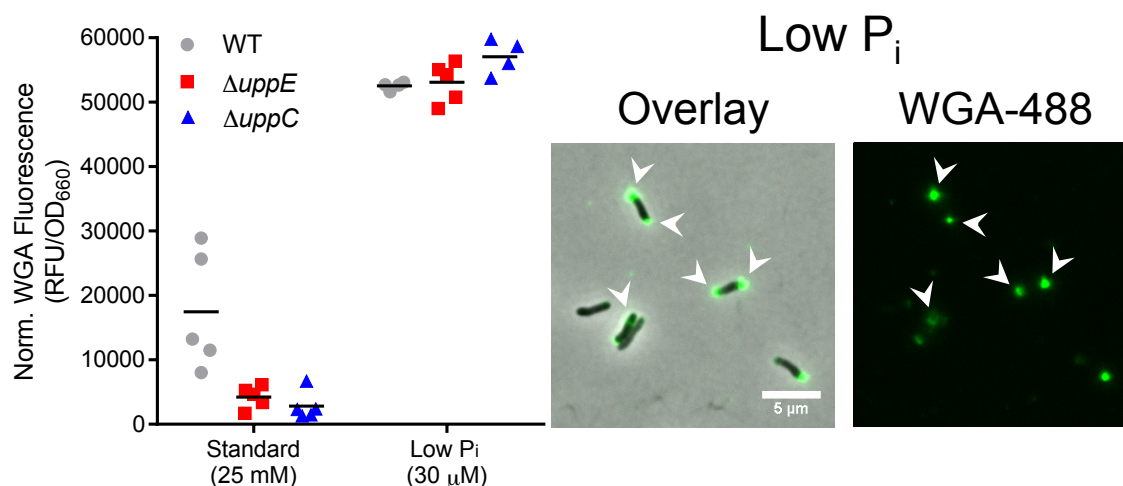

696

697 **FIG S2. Increased total WGA-488 fluorescence and bipolar and cell body staining of *R. palustris***

698 **grown in low P<sub>i</sub> photoheterotrophic conditions.** (A) Normalized total WGA-488 fluorescence from

699 batch UPP quantification via total WGA-fluorescence assay following 3 d of growth under indicated

700 photoheterotrophic conditions. Individual values for biological replicates (n=4-5) are shown with lines

701 indicating the means. (B) Epifluorescence microscopy of WT *R. palustris* cells stained with WGA-488

702 after 2 days of growth in low P<sub>i</sub> photoheterotrophic conditions. Arrowheads indicate staining of bipolar or

703 cell body regions. Scale bar, 5 μm.

704

| <i>Agrobacterium tumefaciens</i> C58 (AE007869.2) query sequence | TBLASTN best hit in <i>Caulobacter crescentus</i> CB15 (AE005673.1) |             |                   |          | BLASTX reciprocal best hit in <i>Agrobacterium tumefaciens</i> C58 ((AE007869.2) |             |                   |          |
|------------------------------------------------------------------|---------------------------------------------------------------------|-------------|-------------------|----------|----------------------------------------------------------------------------------|-------------|-------------------|----------|
|                                                                  | locus tag                                                           | Query cover | % Ident/Positives | E value  | locus tag                                                                        | Query cover | % Ident/Positives | E value  |
| Atu1240/UppA (NP_354252.1, 409 aa)                               | No matches                                                          |             |                   |          | N/A                                                                              |             |                   |          |
| Atu1239/UppB (NP_354251.1, 753 aa)                               | CC_0164                                                             | 51%         | 30%/51%           | 3.00E-37 | Atu3556                                                                          | 99%         | 29%/52%           | 1.00E-41 |
| Atu1238/UppC (NP_354250.1, 190 aa)                               | CC_0169                                                             | 86%         | 39%/61%           | 5.00E-34 | Atu1238/UppC                                                                     | 100%        | 39%/61%           | 8.00E-38 |
| Atu1237/UppD (NP_354249.1, 393 aa)                               | CC_3345                                                             | 46%         | 24%/42%           | 4.00E-03 | Atu2297                                                                          | 92%         | 53%/65%           | 2.00E-49 |
| Atu1236/UppE (NP_354248.2, 517 aa)                               | CC_2425/ <i>hfsE</i>                                                | 70%         | 38%/57%           | 1.00E-71 | Atu1236/UppE                                                                     | 89%         | 41%/60%           | 6.00E-68 |
| Atu1235/UppF (NP_354247.1, 413 aa)                               | CC_1446                                                             | 11%         | 31%/48%           | 2.10     | Atu3137                                                                          | 57%;        | 39%/67%           | 8.00E-04 |
| BLASTP Alignment of putative homologs UppC & HfsD (AAK24403.1)   |                                                                     | 63%         | 33%/46%           | 4.00E-13 |                                                                                  |             |                   |          |

705

706 **TABLE S1. Putative orthologs of UppABCDEF in *C. crescentus* CB15 identified by reciprocal best**  
 707 **hits approach.**

708

| <i>Agrobacterium tumefaciens</i> C58 (AE007869.2) query sequence | TBLASTN best hit in <i>Rhodospseudomonas palustris</i> CGA009 (BX571963.1) |             |                   |           | BLASTX reciprocal best hit in <i>Agrobacterium tumefaciens</i> C58 (NC_003062.2) |             |                   |           |
|------------------------------------------------------------------|----------------------------------------------------------------------------|-------------|-------------------|-----------|----------------------------------------------------------------------------------|-------------|-------------------|-----------|
|                                                                  | locus tag                                                                  | Query cover | % Ident/Positives | E value   | locus tag                                                                        | Query cover | % Ident/Positives | E value   |
| Atu1240/UppA (NP_354252.1, 409 aa)                               | RPA2753                                                                    | 97%         | 28%/44%           | 4.00E-24  | Atu1240/UppA                                                                     | 100%        | 28%/44%           | 3.00E-32  |
| Atu1239/UppB (NP_354251.1, 753 aa)                               | RPA2752                                                                    | 53%         | 39%/60%           | 5.00E-74  | Atu1239/UppB                                                                     | 100%        | 39%/60%           | 3.00E-85  |
| Atu1238/UppC (NP_354250.1, 190 aa)                               | RPA4833                                                                    | 78%         | 52%/72%           | 6.00E-48  | Atu1238/UppC                                                                     | 100%        | 52%/72%           | 1.00E-53  |
| Atu1237/UppD (NP_354249.1, 393 aa)                               | RPA2751                                                                    | 79%         | 40%/56%           | 5.00E-69  | Atu1237/UppD                                                                     | 100%        | 40%/56%           | 7.00E-68  |
| Atu1236/UppE (NP_354248.2, 517 aa)                               | RPA2750                                                                    | 94%         | 49%/62%           | 5.00E-143 | Atu1236/UppE                                                                     | 100%        | 49%/62%           | 6.00E-148 |
| Atu1235/UppF (NP_354247.1, 413 aa)                               | RPA4581                                                                    | 76%         | 38%/57%           | 2.00E-47  | Atu1235/UppF                                                                     | 100%        | 38%/57%           | 2.00E-42  |

709

710 **TABLE S2. Putative orthologs of UppABCDEF in *R. palustris* CGA009 identified by reciprocal best**  
 711 **hits approach.**

712

| WT only                              | Post-hoc test |              |                          |                         |                            |                                   | unpaired, two-tailed t test (Welch's correction) |
|--------------------------------------|---------------|--------------|--------------------------|-------------------------|----------------------------|-----------------------------------|--------------------------------------------------|
|                                      | Dunnett's     | Holm-Sidak's | Uncorrected Fisher's LSD | Dunnett's w/o sea salts | Holm-Sidak's w/o sea salts | Dunnett's on log transformed data |                                                  |
| Standard vs low Pi                   | 0.0686        | 0.0414       | 0.0209                   | < 0.0001                | < 0.0001                   | < 0.0001                          | < 0.0001                                         |
| Standard vs N <sub>2</sub> -fixation | 0.9399        | 0.5633       | 0.5633                   | 0.1685                  | 0.0699                     | < 0.0001                          | < 0.0001                                         |
| Standard vs 1.5% sea salts           | < 0.0001      | < 0.0001     | < 0.0001                 | N/A                     | N/A                        | < 0.0001                          | < 0.0001                                         |
| Standard vs chemoheterotrophy        | 0.0002        | 0.0001       | < 0.0001                 | < 0.0001                | < 0.0001                   | < 0.0001                          | < 0.0001                                         |

713

714 **TABLE S3. Statistical analyses for comparing relative biofilm formation by WT across growth**

715 **conditions in Fig. 3A.** Due to violation of the assumption of homogeneity of variances when performing

716 a Two-way ANOVA for the data plotted in Fig. 3A, multiple statistical analyses were performed and

717 compared to reach a consensus for interpreting this data set.

718



| <b>Alphaproteobacterial species in phylogenetic analysis</b> |                                       |
|--------------------------------------------------------------|---------------------------------------|
| <b>Species</b>                                               | <b>GenBank accession number/taxid</b> |
| <i>Agrobacterium tumefaciens</i> C58                         | AE007869.2/176299                     |
| <i>Rhodopseudomonas palustris</i> CGA009                     | BX571963.1/258594                     |
| <i>Rhizobium leguminosarum</i> bv. <i>viciae</i> 3841        | CP007045.1/216596                     |
| <i>Sinorhizobium meliloti</i> 1021                           | AL591688.1/266834                     |
| <i>Mesorhizobium loti</i> MAFF303099                         | BA000012.4/266835                     |
| <i>Bradyrhizobium japonicum</i> USDA 110                     | BA000040.2/224911                     |
| <i>Bradyrhizobium</i> sp. BTAi1                              | LN901633.1/288000                     |
| <i>Rhodopseudomonas palustris</i> BisA53                     | CP000463.1/316055                     |
| <i>Nitrobacter winogradskyi</i> Nb-255                       | CP000115.1/323098                     |
| <i>Nitrobacter hamburgensis</i> X14                          | CP000319.1/323097                     |
| <i>Ochrobactrum anthropi</i> ATCC 49188                      | CP000758.1/439375                     |
| <i>Brucella melitensis</i> 16M                               | AE008917.1/224914                     |
| <i>Brucella suis</i> 1330                                    | AE014291.4/204722                     |
| <i>Bartonella henselae</i> Houston-1                         | BX897699.1/283166                     |
| <i>Bartonella bacilliformis</i> KC583                        | CP000524.1/360095                     |
| <i>Xanthobacter autotrophicus</i> Py2                        | CP000781.1/78245                      |
| <i>Azorhizobium caulinodans</i> ORS 571                      | AP009384.1/438753                     |
| <i>Methylobacterium extorquens</i> AM1                       | CP001510.1/272630                     |
| <i>Prosthecomicrobium hirschi</i> ATCC 27832T                | LJYW00000000.1/665126                 |
| <i>Rhodomicrobium vannielii</i> ATCC 17100                   | CP002292.1/648757                     |
| <i>Hyphomicrobium denitrificans</i> 1NES1                    | CP002083.1/670307                     |
| <i>Parvibaculum lavamentivorans</i> DS-1                     | CP000774.1/402881                     |
| <i>Caulobacter crescentus</i> CB15                           | AE005673.1/190650                     |
| <i>Maricaulis maris</i> MCS10                                | CP000449.1/394221                     |
| <i>Phaeobacter inhibens</i> DSM 17395                        | CP002976.1/391619                     |
| <i>Ruegeria pomeroyi</i> DSS-3                               | NC_003911.12/246200                   |

719

720 **TABLE S4.  $\alpha$ -proteobacterial species used for phylogenetic analysis.**

721 The 26  $\alpha$ -proteobacterial species in the phylogeny in Fig. 4 and their corresponding GenBank accession

722 number and taxid for analysis of the conservation and distribution of core *upp* gene clusters across the

723 order *Rhizobiales*.
